# Supplementary material for: TCR-Engineered T Cells Directed against Ropporin-1 Constitute a Safe and Effective Treatment for Triple-Negative Breast Cancer
Source: PubMed Central journal article supplement — Cancer Discov. 2024 Aug 21;14(12):2450–70. doi: 10.1158/2159-8290.CD-24-0168 (PMC11609630; doi:10.1158/2159-8290.cd-24-0168), 2024-08-21
Supplement: cd-24-0168_supplementary_figure_1_suppsf1.pdf [file cd-24-0168_supplementary_figure_1_suppsf1.pdf]

# Supplementary Figure 1.

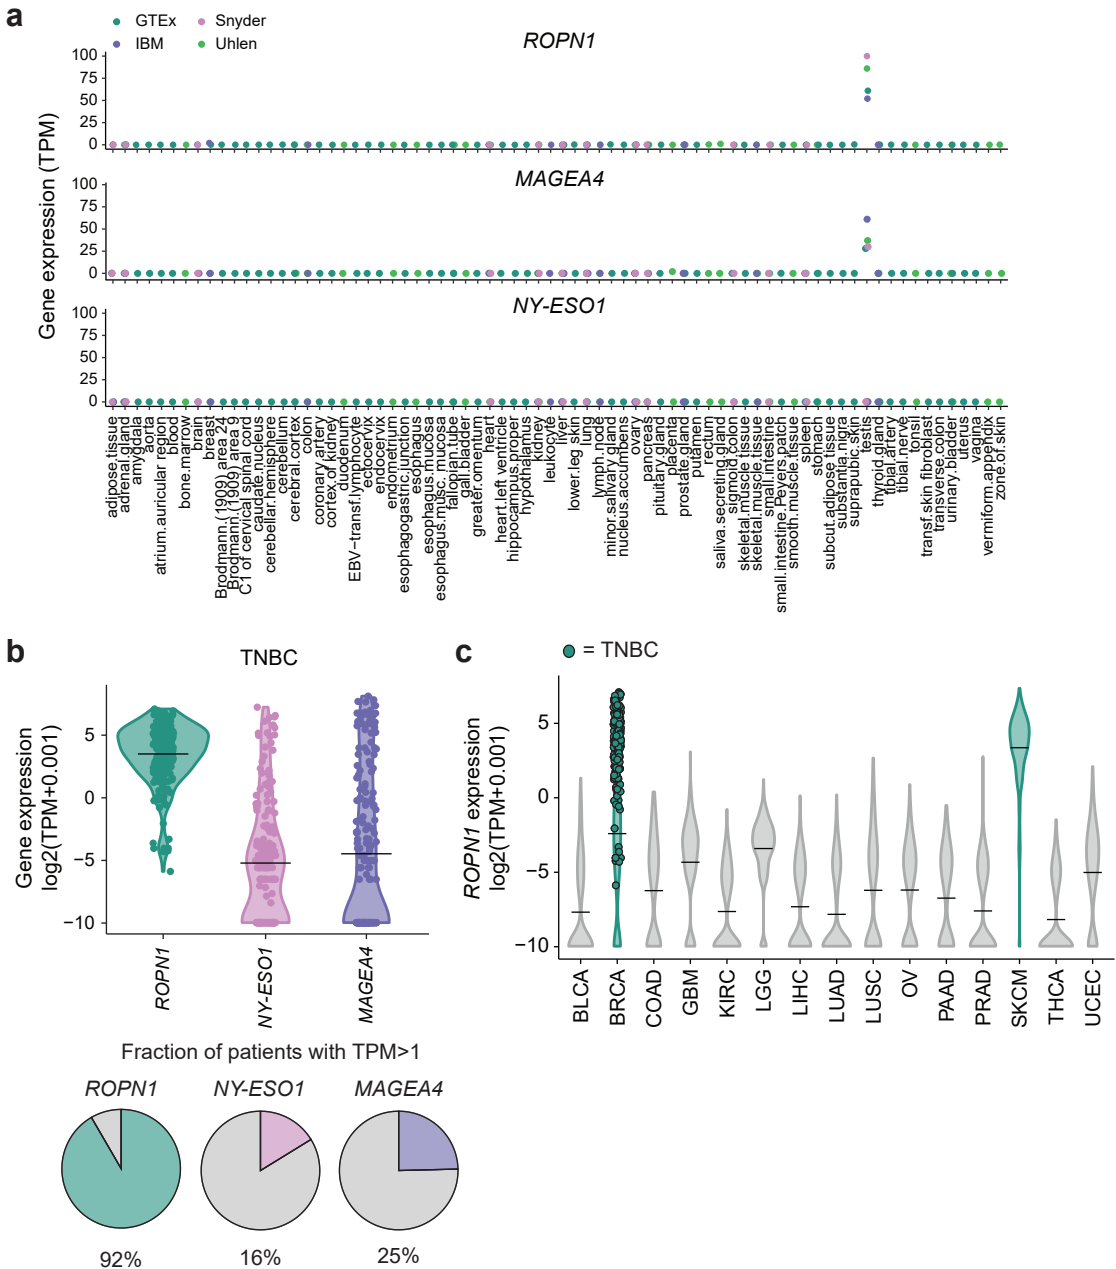

## Supplementary figure 1. Expressions of ROPN1/B, NY-ESO1 and MAGEA4 target antigens in healthy tissues, TNBC and other tumor types. a) Dot plots represent average gene expression of ROPN1, MAGEA4 and CTAG1B (NY-ESO1) in healthy tissues (TPM values) according to RNAseq of 4 different healthy tissue datasets (Uhlen: n=122 individuals, n=32 tissues (purple); GTEx: n=1,315 individuals, n=53 tissues (dark green); Illumina body map: n=32 individuals, n=17 tissues (light green); Snyder Lab: n=25 individuals, n=13 tissues (pink)). b) Violin plot shows distribution of gene expressions of ROPN1 (green), CTAG1B (NY-ESO1, pink) and MAGEA4 (purple) in the TCGA TNBC cohort (n=191, log<sub>2</sub>(TPM+0.001) normalized). Pie charts show fractions of TNBC tumors with gene expression for these 3 target antigens (TPM>1). c) Violin plot shows distribution of ROPN1 gene expressions in 15 tumor types retrieved from TCGA cohorts (log<sub>2</sub>(TPM+0.001) normalized). BRCA and SKCM are visualized in green; individual TNBC samples within the BRCA cohort are shown as green dots. Abbreviations in figure: BLCA, Bladder Urothelial Carcinoma; BRCA, Breast Carcinoma; COAD, Colon Adenocarcinoma; GBM, Glioblastoma Multiforme; KIRC, Kidney Renal Clear Cell Carcinoma; LIHC, Liver Hepatocellular Carcinoma; LUAD, Lung Adenocarcinoma; LUSC, Lung Squamous Cell Carcinoma; OV, Ovarian Serous Cystadenocarcinoma; PAAD, Pancreatic Adenocarcinoma; PRAD, Prostate Adenocarcinoma; SKCM, Skin Cutaneous Melanoma; THCA, Thyroid Carcinoma; UCEC, Uterine Corpus Endometrial Carcinoma.

Supplementary figure 1. Expressions of ROPN1/B, NY-ESO1 and MAGEA4 target antigens in healthy tissues, TNBC and other tumor types. a) Dot plots represent average gene expression of ROPN1, MAGEA4 and CTAG1B (NY-ESO1) in healthy tissues (TPM values) according to RNAseq of 4 different healthy tissue datasets (Uhlen: n=122 individuals, n=32 tissues (purple); GTEx: n=1,315 individuals, n=53 tissues (dark green); Illumina body map: n=32 individuals, n=17 tissues (light green); Snyder Lab: n=25 individuals, n=13 tissues (pink)). b) Violin plot shows distribution of gene expressions of ROPN1 (green), CTAG1B (NY-ESO1, pink) and MAGEA4 (purple) in the TCGA TNBC cohort (n=191, log<sub>2</sub>(TPM+0.001) normalized). Pie charts show fractions of TNBC tumors with gene expression for these 3 target antigens (TPM>1). c) Violin plot shows distribution of ROPN1 gene expressions in 15 tumor types retrieved from TCGA cohorts (log<sub>2</sub>(TPM+0.001) normalized). BRCA and SKCM are visualized in green; individual TNBC samples within the BRCA cohort are shown as green dots. Abbreviations in figure: BLCA, Bladder Urothelial Carcinoma; BRCA, Breast Carcinoma; COAD, Colon Adenocarcinoma; GBM, Glioblastoma Multiforme; KIRC, Kidney Renal Clear Cell Carcinoma; LIHC, Liver Hepatocellular Carcinoma; LUAD, Lung Adenocarcinoma; LUSC, Lung Squamous Cell Carcinoma; OV, Ovarian Serous Cystadenocarcinoma; PAAD, Pancreatic Adenocarcinoma; PRAD, Prostate Adenocarcinoma; SKCM, Skin Cutaneous Melanoma; THCA, Thyroid Carcinoma; UCEC, Uterine Corpus Endometrial Carcinoma.
