# Supplementary material for: TCR-Engineered T Cells Directed against Ropporin-1 Constitute a Safe and Effective Treatment for Triple-Negative Breast Cancer
Source: PubMed Central journal article supplement — Cancer Discov. 2024 Aug 21;14(12):2450–70. doi: 10.1158/2159-8290.CD-24-0168 (PMC11609630; doi:10.1158/2159-8290.cd-24-0168), 2024-08-21
Supplement: cd-24-0168_supplementary_figure_3_suppsf3.pdf [file cd-24-0168_supplementary_figure_3_suppsf3.pdf]

## Supplementary Figure 3.

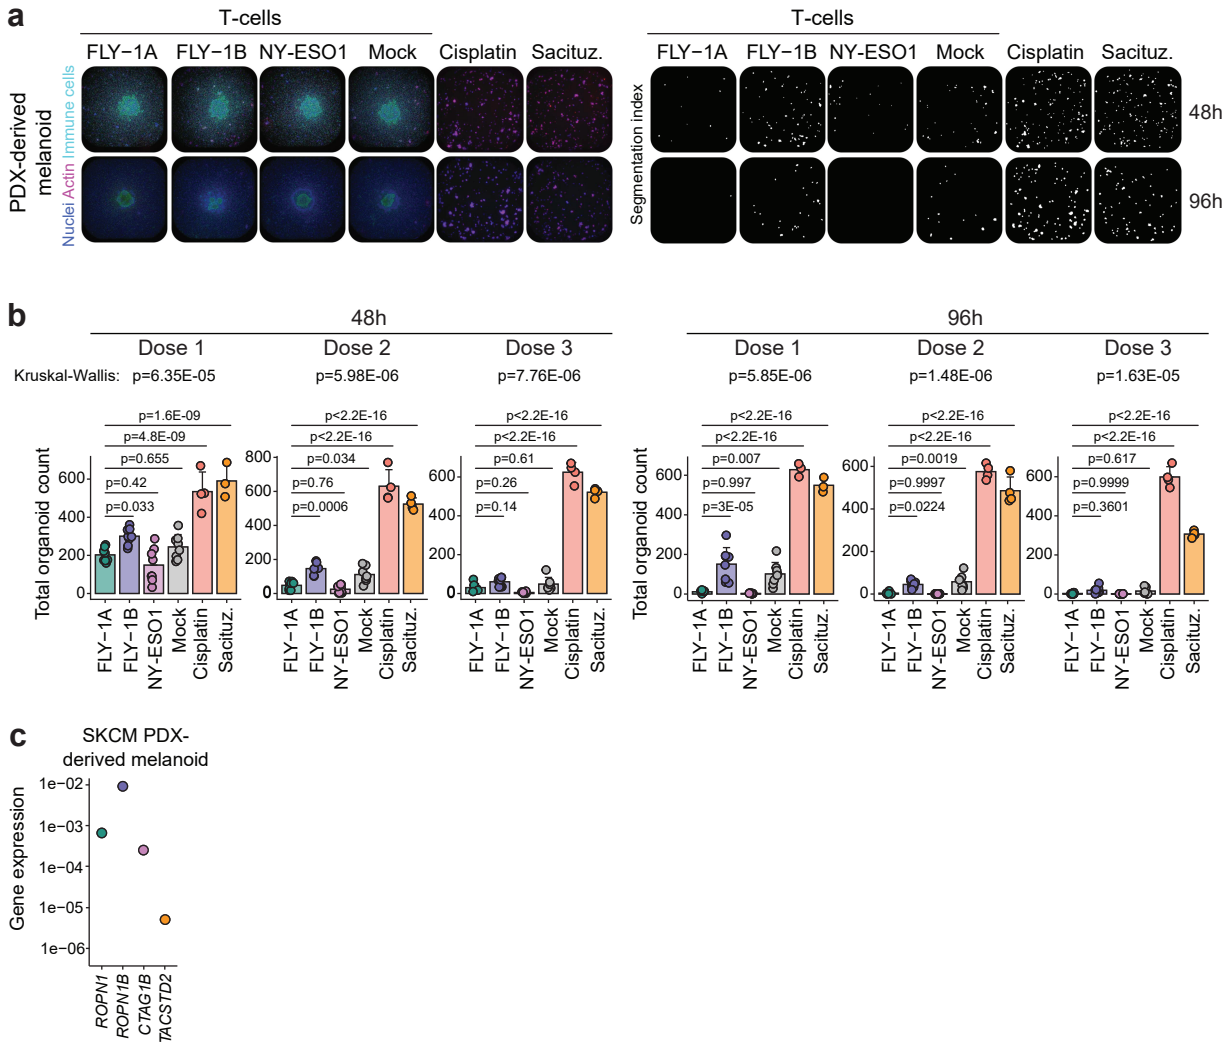

**Supplementary figure 3. FLY-1A TCR T-cells recognize melanoma tumoroids.** **a)** Representative microscopy images of skin cutaneous melanoma (SKCM) PDX derived organoids at 48h and 96h after addition of T-cells or drug compounds (See **Methods** and legend to **Figure 4** for details). Left images: Actin shown in pink and nuclei visualized in blue represent living melanoma organoids, whereas immune cells are visualized in green. Right images: Segmented images show the viable organoids (white) from the images of the left panel at 48h and 96h. **b)** Bar plots represent total cell count of SKCM PDX-derived organoid at 48 (left panel) and 96h (right panel) after addition of 3 doses of the T-cells or drug compounds (n=2 donors, 4 replicates per donor). Mean and SD are shown. **c)** Dot plot represents gene expressions of *ROPN1* (green), *ROPN1B* (purple), *CTAG1B* (NY-ESO1, pink) and *TACSTD2* (encoding for TROP2, orange) of a SKCM PDX-derived organoid expressed as fold change relative to *GAPDH* according to RT-qPCR (n=1).
