# Supplementary material for: TCR-Engineered T Cells Directed against Ropporin-1 Constitute a Safe and Effective Treatment for Triple-Negative Breast Cancer
Source: PubMed Central journal article supplement — Cancer Discov. 2024 Aug 21;14(12):2450–70. doi: 10.1158/2159-8290.CD-24-0168 (PMC11609630; doi:10.1158/2159-8290.cd-24-0168), 2024-08-21
Supplement: cd-24-0168_supplementary_figure_5_suppsf5.pdf [file cd-24-0168_supplementary_figure_5_suppsf5.pdf]

# Supplementary Figure 5.

**a**

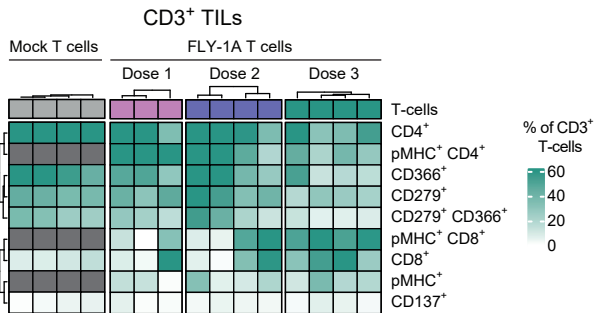

**b**

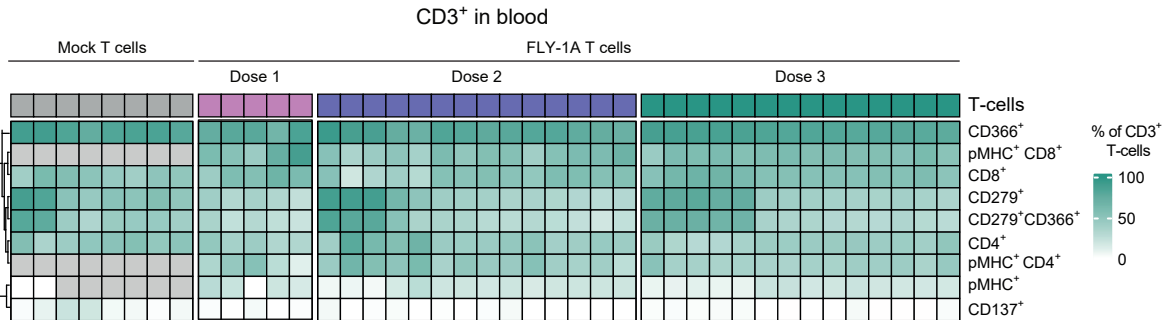

**Supplementary figure 5. Extended phenotypes of intra-tumoral and peripheral T-cells following adoptive transfer of FLY-1A TCR T cells.** **a)** Flow cytometric analysis of intra-tumoral T-cells at day 8/9 following ACT into tumor-bearing mice (See **Methods** and legend to **Figure 5** for details). Heatmap reflects percentages of CD3<sup>+</sup> T-cells that show the following phenotypes: pMHC<sup>+</sup>, CD4<sup>+</sup>, CD8<sup>+</sup>, pMHC<sup>+</sup> CD4<sup>+</sup>, pMHC<sup>+</sup> CD8<sup>+</sup>, CD137<sup>+</sup>, CD279<sup>+</sup>, CD366<sup>+</sup> and CD279<sup>+</sup> CD366<sup>+</sup>. **b)** Flow cytometric analysis of peripheral T-cells at day 8/9 following ACT into tumor-bearing mice. Heatmap reflects percentages of CD3<sup>+</sup> T-cells that show the same phenotypes as in a.
