# Supplementary material for: TCR-Engineered T Cells Directed against Ropporin-1 Constitute a Safe and Effective Treatment for Triple-Negative Breast Cancer
Source: PubMed Central journal article supplement — Cancer Discov. 2024 Aug 21;14(12):2450–70. doi: 10.1158/2159-8290.CD-24-0168 (PMC11609630; doi:10.1158/2159-8290.cd-24-0168), 2024-08-21
Supplement: cd-24-0168_supplementary_figure_6_suppsf6.pdf [file cd-24-0168_supplementary_figure_6_suppsf6.pdf]

## Supplementary Figure 6.

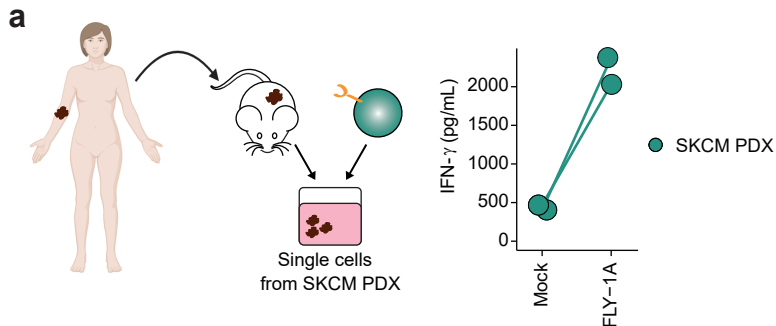

**Supplementary figure 6. FLY-1A TCR T-cells recognize patient-derived melanoma cells.** a) FLY-1A TCR T-cells recognize SKCM PDX. IFN- $\gamma$  production by FLY-1A TCR was measured upon co-culture with single cell suspensions derived from a ROPN1<sup>+</sup> HLA-A2<sup>+</sup> SKCM PDX sample (n=2 donors). Mock T-cells were used as a negative control. Abbreviations in figure: Sacituz., Sacituzumab govitecan.
