# Supplementary material for: TCR-Engineered T Cells Directed against Ropporin-1 Constitute a Safe and Effective Treatment for Triple-Negative Breast Cancer
Source: PubMed Central journal article supplement — Cancer Discov. 2024 Aug 21;14(12):2450–70. doi: 10.1158/2159-8290.CD-24-0168 (PMC11609630; doi:10.1158/2159-8290.cd-24-0168), 2024-08-21
Supplement: cd-24-0168_supplementary_figure_7_suppsf7.pdf [file cd-24-0168_supplementary_figure_7_suppsf7.pdf]

## Supplementary Figure 7.

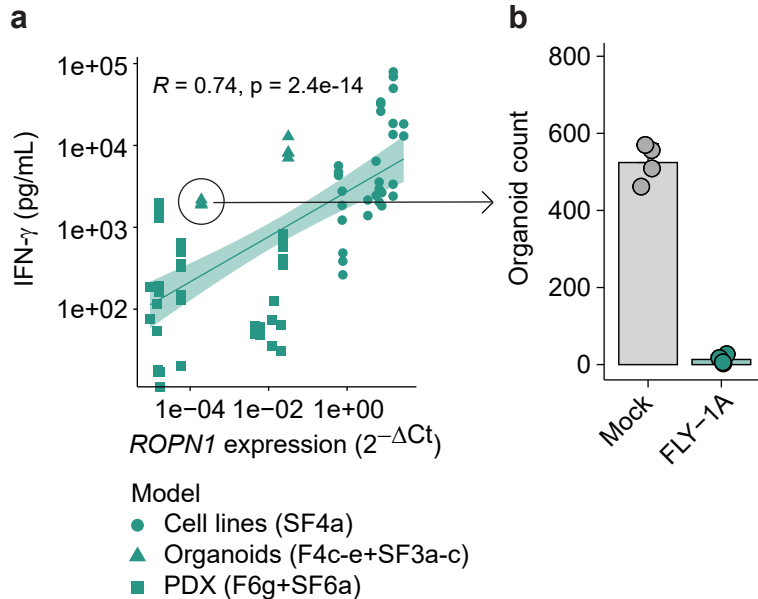

**Supplementary figure 7. Extent of recognition of the ROPN1 target by FLY-1A TCR T cells correlates with level of expression. a)** Scatter plot shows the Spearman correlation between *ROPN1* mRNA expression and IFN- $\gamma$  production ( $R=0.74, p<2.2e-16$ ) by FLY-1A TCR T-cells upon stimulation with either ROPN1<sup>+</sup> HLA-A2<sup>+</sup> cell lines ( $n=30$  from 3 different cell lines, circle), ROPN1<sup>+</sup> HLA-A2<sup>+</sup> organoids ( $n=8$  from 2 different organoids, triangle) or ROPN1<sup>+</sup> HLA-A2<sup>+</sup> PDX ( $n=40$  from 9 different PDX's, square). IFN- $\gamma$  (in pg/mL) of Mock T-cells was subtracted from that of FLY-1A TCR T-cells. Below the plot there is a referral to the figures where the data are displayed per model. **b)** Bar plot represents total cell count of TNBC PDX-derived organoids from b at 48h after addition of Mock (grey) or FLY-1A TCR T-cells (green,  $n=2$  donors, 2 replicates per donor).
