# Supplementary material for: TCR-Engineered T Cells Directed against Ropporin-1 Constitute a Safe and Effective Treatment for Triple-Negative Breast Cancer
Source: PubMed Central journal article supplement — Cancer Discov. 2024 Aug 21;14(12):2450–70. doi: 10.1158/2159-8290.CD-24-0168 (PMC11609630; doi:10.1158/2159-8290.cd-24-0168), 2024-08-21
Supplement: cd-24-0168_supplementary_figure_8_suppsf8.pdf [file cd-24-0168_supplementary_figure_8_suppsf8.pdf]

## Supplementary Figure 8.

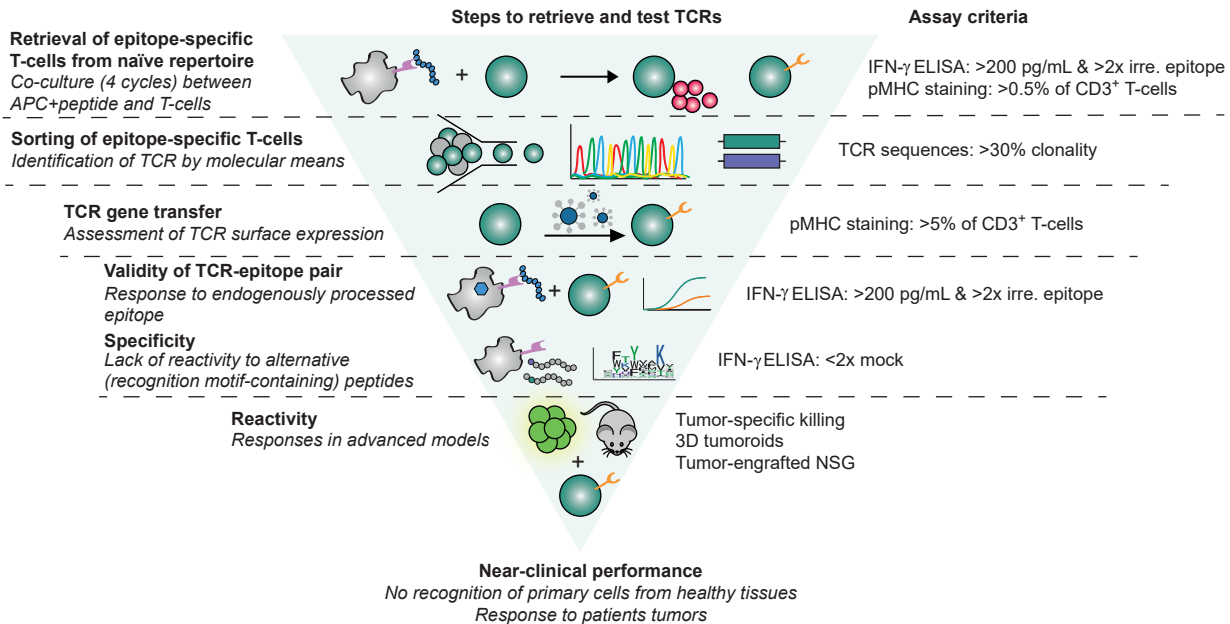

**Supplementary figure 8. Stepwise approach from retrieval and identification of TCRs to the functional testing of their sensitivity, specificity and reactivity.** Cartoon illustrating in 6 steps how ROPN1/B-specific CD8<sup>+</sup> T-cells were retrieved, the corresponding TCRs identified and tested according to in vitro, in vivo, and ex vivo assays for sensitivity, specificity and reactivity. Per step, the inclusion criteria that need to be reached for epitope-specific T-cells or TCRs to move to the next step are displayed to the right. Abbreviations in figure: APC, antigen presenting cell; irre. epitope, irrelevant epitope; NSG, NOD SCID gamma.
