# Supplementary material for: TCR-Engineered T Cells Directed against Ropporin-1 Constitute a Safe and Effective Treatment for Triple-Negative Breast Cancer
Source: PubMed Central journal article supplement — Cancer Discov. 2024 Aug 21;14(12):2450–70. doi: 10.1158/2159-8290.CD-24-0168 (PMC11609630; doi:10.1158/2159-8290.cd-24-0168), 2024-08-21
Supplement: cd-24-0168_supplementary_figure_9_suppsf9.pdf [file cd-24-0168_supplementary_figure_9_suppsf9.pdf]

## Supplementary Figure 9.

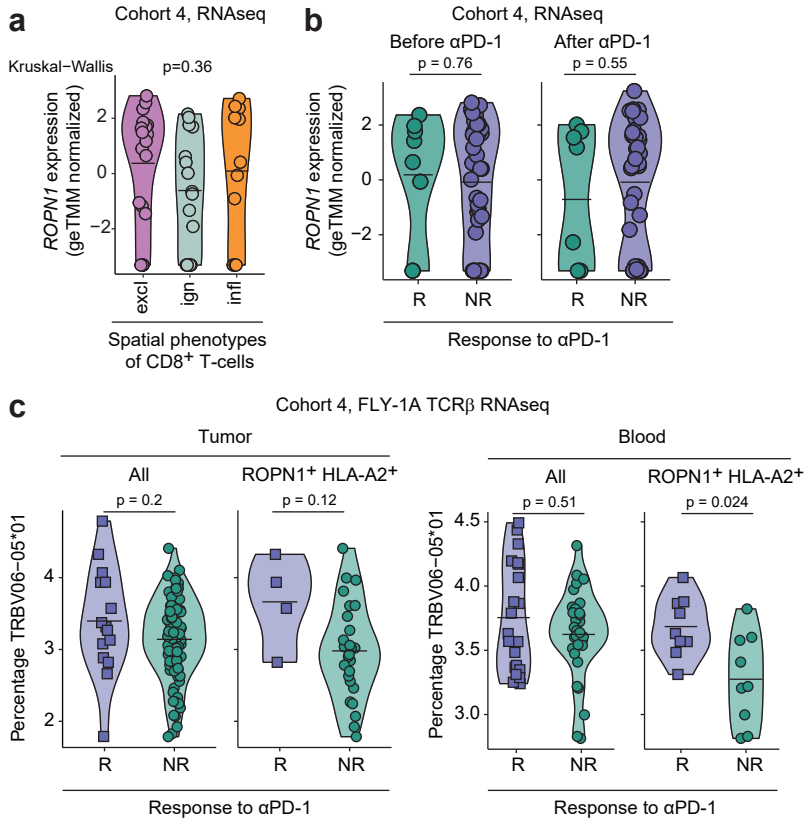

**Supplementary figure 9. Presence of *ROPN1* and *FLY-1A TCRβ* in metastatic TNBC in relation to endogenous T cell phenotype and anti-PD1 response.** **a)** Violin plot shows distribution of *ROPN1* gene expression according to spatial phenotypes of CD8<sup>+</sup> T-cells of metastatic TNBC retrieved from cohort 4 (n=53, geTMM normalized). The spatial phenotypes of CD8<sup>+</sup> T-cells included: excluded (excl), ignored (ign) and inflamed (infl). Kruskal-Wallis Rank test was performed to test differential *ROPN1* expression among spatial phenotypes: p=0.36. **b)** Violin plot shows distribution of *ROPN1* gene expression in metastatic TNBC according to response to αPD-1 retrieved from cohort 4 (n=53, geTMM normalized). R and NR samples were assessed before and after treatment. The Wilcoxon signed-rank test was performed to test differential *ROPN1* expression among R versus NR: before αPD-1: p=0.76, after αPD-1: p=0.55. **c)** Left panel: Violin plots show the percentage of TRBV06-05\*01 (from a total of 305,969 sequences) in all (n=43) or ROPN1<sup>+</sup> HLA-A2<sup>+</sup> metastatic TNBC (n=13) according to response to αPD-1 retrieved from cohort 4. Right panel: Violin plots show the percentage of TRBV06-05\*01 (from a total of 3,925,885 sequences) in blood of all (n=17) or ROPN1<sup>+</sup> HLA-A2<sup>+</sup> metastasized TNBC patients (n=6) according to response to αPD-1 retrieved from cohort 4. The Wilcoxon signed-rank test was performed to test significance between R versus NR. Abbreviations in figure: NR, non-responders; R, responders; TRBV, T Cell Receptor Variable domain.
