# Supplementary material for: TCR-Engineered T Cells Directed against Ropporin-1 Constitute a Safe and Effective Treatment for Triple-Negative Breast Cancer
Source: PubMed Central journal article supplement — Cancer Discov. 2024 Aug 21;14(12):2450–70. doi: 10.1158/2159-8290.CD-24-0168 (PMC11609630; doi:10.1158/2159-8290.cd-24-0168), 2024-08-21
Supplement: cd-24-0168_supplementary_methods_suppsmref.pdf [file cd-24-0168_supplementary_methods_suppsmref.pdf]

## Supplementary methods

### *Immunopectidomics and mass spectrometry of MDA-MB-231 ROPN1B cells*

HLA-I peptidomes were obtained from  $270 \times 10^6$  MDA-MB-231 ROPN1B cells as before (1). In brief, cell pellets were thawed and lysed in a concentration of  $70 \times 10^6$ /mL in lysis buffer containing 0.5% zwittergent 3-12 (Sigma) and protease inhibitors for 1 h on ice. Lysates were cleared by centrifugation at 4°C for 10 min at 17,000 g and supernatants were pre-cleared with unconjugated nProtein A Sepharose® 4 Fast Flow beads (GE Healthcare) in suspension for 1 h rolling at 4°C. Cleared lysates were subsequently incubated with 135 µL w6/32 anti-HLA-I antibody covalently cross-linked to nProtein A Sepharose® 4 Fast Flow beads rolling for 1 h at 4°C in suspension after which HLA-I-bound beads were pelleted by centrifugation at 18 g for 30 sec at 4°C. HLA-I-bound beads were washed repetitively with high and low salt TRIS buffer to remove contaminants as before (1) prior to peptide elution .

HLA peptides were eluted from the beads with 500 µl 0.15 % TFA and cleaned up using a 10 kD MWCO column (Amicon, 42407). Peptides were desalted and eluted with 28% acetonitrile/0.1% TFA. Nanoflow LC-MS/MS was performed on an EASY-nLC 1200 coupled to an Orbitrap Lumos Tribrid mass spectrometer (Thermo Fisher Scientific) operating in positive ion mode. MS spectra were acquired from 375 to 1,200 m/z in the Orbitrap at 120,000 resolution. Peptides were fragmented by HCD using a collision energy (CE) of 30% and MS/MS spectra were subsequently recorded in the Orbitrap at 30,000 resolution.

Raw mass spectrometry data were analyzed with Proteome Discoverer 2.5 (ThermoFisher Scientific) with standard settings. The digestion mode was set to 'unspecific' (no enzyme), while the error tolerances for parent mass and fragment masses were 10 ppm and 20 ppm, respectively.

### *Immunopectidomics and mass spectrometry of K562ABC ROPN1B cells*

Pellets of  $1 \times 10^8$  ROPN1B-expressing K562ABC cells were lysed in PBS buffer containing 0.25% sodium deoxycholate, 0.2 mM iodoacetamide, 1 mM EDTA, 1:200 Protease Inhibitors Mixture (Sigma), 1 mM Phenyl Methyl Sulfonyl Fluoride (PMSF), and 1% octyl-β-D glucopyranoside (Sigma) at 4°C for 1h. Lysates were cleared by 30 min centrifugation at 40,000g and supernatants were subjected to sequential immunoaffinity purification of MHC class I with the W6/32 antibody covalently bound to Protein-A Sepharose beads (Invitrogen, Camarillo, CA) using our previously described protocol(2). To this end, we applied the Waters Positive Pressure-96 Processor and 96-well single-use micro-plates with 3 µm glass fibers and 10 µm polypropylene membranes (Seahorse Bioscience). After loading, the beads in the plates were washed separately with varying concentrations of salts using the processor. Subsequently, the beads were washed twice with 20 mM Tris-HCl, pH 8, and eluted with

1% trifluoroacetic acid (TFA; Sigma Aldrich) directly into preconditioned Sep-Pak tC18 100 mg Sorbent 96-well plates (Waters). After an additional wash step with C18 sorbent with 0.1% TFA, MHC class I peptides were eluted with 28% acetonitrile (ACN; Sigma Aldrich) in 0.1% TFA, and recovered peptides were dried using vacuum centrifugation (Concentrator plus, Eppendorf) and stored at  $-20^{\circ}\text{C}$ . Prior to mass spectrometry (MS), peptide samples were re-suspended in ACN/FA (2%/0.1%), placed in the autosampler of the mass spectrometer, and measured in technical duplicates. MHC-bound peptides were separated by an Easy-nLC 1200 coupled on-line to a Q Exactive HFX mass spectrometer (Thermo Fisher Scientific, Bremen, Germany). A home-made 50 cm long (75  $\mu\text{m}$  inner diameter) column was packed with ReproSil-Pur C18-AQ 1.9  $\mu\text{m}$  resin (kindly provided by dr. Maisch, GmbH) in MeOH. MHC class I peptides were eluted with a linear gradient of 2–28% and 0.1% FA at a flow rate of 250 nl/min over 125 min. MS spectra were acquired from  $m/z=300$ -1650 in the Orbitrap with a resolution of 60,000 ( $m/z=200$ ) and an ion accumulation time of 80 ms. The auto gain control (AGC) was set to  $3 \times 10^6$  ions. MS/MS spectra were acquired for the 20 most abundant precursor ions with a resolution of 15,000 ( $m/z=200$ ), an ion accumulation time of 120 ms and an isolation window of 1.2  $m/z$ . The AGC was set to  $2 \times 10^5$  ions, a dynamic exclusion of 20 s and a normalized collision energy of 27. No fragmentation was performed for MHC class I peptides in case of assigned precursor ion charge states of four and above. Immunopeptidomics data of K562ABC cells was searched with a PSM false discovery rate of 1% with the MaxQuant platform(3) version 1.6.10.43 against the human proteome UP000005640\_9606 reference and a list of 247 frequently observed contaminants. The enzyme specificity was set to non-specific and protein FDR was not set. Peptides with a length between 8 and 25 amino acids were included in our analyses. The initially allowed mass deviation of the precursor ion was set to 6 ppm and the maximum fragment mass deviation was set to 20 ppm. Methionine oxidation and N-terminal acetylation were set as variable modifications.

#### *HLA-A2 stabilization assay*

The HLA-A2 stabilization assay was performed using T2 cells as described in(4) with a slightly adapted protocol. In short,  $0.15 \times 10^6$  T2 cells were incubated with (titrated amounts of) peptide for 3h at  $37^{\circ}\text{C}/5\%\text{CO}_2$  in serum-free medium supplemented with 3  $\mu\text{g}/\text{mL}$   $\beta$ 2-microglobulin (Sigma). Surface expressed HLA-A2 molecules were measured with flow cytometry using the HLA-A2 mAb BB7.2 (BD Pharmingen, 1:20). To this end, T2 cells were washed, and stained using fluorescently-labeled antibody, incubated for 25 min on ice in the dark, washed twice and dissolved in PBS. Cells were gated for viability using flow cytometry, and events were acquired on a FACS Celesta (BD) flow cytometer and analyzed using FlowJo software (version 10.7.1, TreeStar, Ashland, OR). In a first screen for HLA-A2 binding, peptides were used at a concentration of 33  $\mu\text{g}/\text{mL}$ ; in case this resulted in  $>1.1$ -fold change

(FC) over baseline (T2 cells without peptide), then these peptides entered a second screen and were further titrated from 31 nM to 31  $\mu$ M.

#### *Testing reactivity of TCR T-cells towards 3D organoid models*

Organoid models from PDX from breast and skin tumor-derived were established as described(5). The TNBC PDX BR5010B was expanded in Advanced DMEM/F12 (ThermoFisher) supplemented with 1% Glutamax (ThermoFisher), 1% antibiotics (ThermoFisher), 1% HEPES (Cat#15630-056, ThermoFisher), EGF (5 ng/mL), R-spondin 3 (250 ng/mL), FGF7 (20 ng/mL), FGF10 (20 ng/mL), Heregulin (37.5 ng/mL), SB202190 (500 nM), vitamin B27 (1x), n-Acetyl Cysteine (1.25 mM), Nicotinamide (1M), A83-01 (5 mM), Noggin (100  $\mu$ g/mL) and Rhoki (10 mM). The melanoma PDX ME12086B was expanded in DMEM/F12 supplemented with EGF (50 ng/mL), ITS (insulin-transferrin-selenium-X supplement) (0.5x), Heparin (2  $\mu$ g/mL), NEEA (1x), Glutamax (1x), FBS (10x), Rhoki (10  $\mu$ M) and hydrocortisone (50 nM). On day 0, these 2 PDX organoids were seeded in 3D hydrogels (Proprietary, Crown Bioscience Netherlands B.V.) in 384 well plates (Greiner  $\mu$ Clear, Greiner Bio-One B.V.), T-cell medium was added on top and the gel-embedded PDX'es were incubated at 37°C/5%CO<sub>2</sub> for 48 hours. On day 2, T-cells (i.e., Mock, FLY-1A, FLY-1B or NY-ESO1) were collected and stained with cell tracker (CellTracker™ Green CMFDA Dye, Invitrogen), resuspended in T cell medium and added on top of the 3D hydrogels at different ratios of organoids to T-cells. Cisplatin and Sacituzumab-govitecan, used as drug comparators, were added to tumor organoids at 0.1, 1 and 10  $\mu$ M and 0.1, 1 and 10 nM, respectively. After 48 and 96h, plates were fixed, stained and tumor volumes were analyzed. To this end, cultures were fixed with 4% Formaldehyde (Sigma Aldrich) and simultaneously permeabilized with Triton-X100 (Sigma Aldrich) and stained with rhodamine-phalloidin (Sigma Aldrich) and Hoechst 33258 (Sigma Aldrich) in PBS (Sigma Aldrich) overnight at 4°C, protected from light. After fixation and staining, plates were washed with PBS, sealed with a Greiner SilverSeal (Greiner Bio-One B.V.) and stored at 4°C prior to imaging. Imaging was performed using Molecular Devices ImageXpress Micro XLS with a 4x NIKON objective. For each well, multiple images in the Z-direction were made for both channels, capturing the whole plane in each well. Image analysis was performed using Ominer® software (Crown Bioscience Netherlands B.V.). Individual organoids and immune cells were segmented using detection of Hoechst-stained nuclei, rhodamine-phalloidin-stained cellular F-actin and cell tracker-stained T-cells. These segmentation masks were used to analyze the organoid counts and morphologic profile of organoids per well. Experiments and analyses were performed by personnel at the premises of Crown Bioscience, Netherlands, Leiden.

## References

1. de Beijer MTA, Bezstarosti K, Luijten R, Doff WAS, Boor PPC, Pieterman RFA, et al. Immunopeptidome of hepatocytes isolated from patients with HBV infection and hepatocellular carcinoma. *JHEP Reports*. Elsevier; 2022;4:100576.
2. Chong C, Marino F, Pak H, Racle J, Daniel RT, Müller M, et al. High-throughput and Sensitive Immunopeptidomics Platform Reveals Profound Interferony-Mediated Remodeling of the Human Leukocyte Antigen (HLA) Ligandome\*. *Mol Cell Proteomics*. 2017;17:533–48.
3. Cox J, Mann M. MaxQuant enables high peptide identification rates, individualized p.p.b.-range mass accuracies and proteome-wide protein quantification. *Nat Biotechnol* [Internet]. 2008;26:1367–72. Available from: <https://doi.org/10.1038/nbt.1511>
4. Miles KM, Miles JJ, Madura F, Sewell AK, Cole DK. Real time detection of peptide–MHC dissociation reveals that improvement of primary MHC-binding residues can have a minimal, or no, effect on stability. *Mol Immunol*. Pergamon; 2011;48:728–32.
5. Van De Wetering M, Francies HE, Francis JM, Bounova G, Iorio F, Pronk A, et al. Prospective derivation of a living organoid biobank of colorectal cancer patients. *Cell*. Cell Press; 2015;161:933–45.
