# Supplementary material for: TCR-Engineered T Cells Directed against Ropporin-1 Constitute a Safe and Effective Treatment for Triple-Negative Breast Cancer
Source: PubMed Central journal article supplement — Cancer Discov. 2024 Aug 21;14(12):2450–70. doi: 10.1158/2159-8290.CD-24-0168 (PMC11609630; doi:10.1158/2159-8290.cd-24-0168), 2024-08-21
Supplement: cd-24-0168_supplementary_table_1_suppst1.pdf [file cd-24-0168_supplementary_table_1_suppst1.pdf]

**Supplementary table 1.** Top-ranked ROPN1/B peptides and their scores for immunogenicity, non-cross reactivity, HLA-A2 binding and immunogenicity.

| PEPTIDE     | Protein  | Length | Source            | PREDICTED IMMUNOGENICITY <sup>a</sup> |            |           |         | EXPITOPE <sup>b</sup> | HLA-A2 STABILIZATION ASSAYS |           |          | IMMUNOGENICITY  |               |                          |
|-------------|----------|--------|-------------------|---------------------------------------|------------|-----------|---------|-----------------------|-----------------------------|-----------|----------|-----------------|---------------|--------------------------|
|             |          |        |                   | NetCTL pan                            | NetMHC pan | SYFPEITHI | RANKPEP | Cross-reactivity?     | Min. binding                | Amplitude | EC50     | T cell response | TCR retrieval | Recognition <sup>c</sup> |
| EVIGPDGLITV | ROPN1B   | 11-mer | Eluted            |                                       |            |           |         | No                    | 1,569                       | 1,120     | 6,65E-07 | Yes             | Yes           | Yes                      |
| FLYTYIAKV   | ROPN1    | 9-mer  | Predicted /Eluted | 1                                     | 1          | 1         | 1       | No                    | 1,561                       | 1,062     | 1,34E-05 | Yes             | Yes           | Yes                      |
| FLALACSAL   | ROPN1/1B | 9-mer  | Predicted         | 3                                     | 11         | 5         | 6       | No                    | 1,304                       | 0,855     | 4,84E-06 | Yes             | No            | x                        |
| FLYTYIAEV   | ROPN1B   | 9-mer  | Predicted         | 1                                     | 1          | 1         | 1       | No                    | 1,423                       | 0,855     | 2,08E-05 | Yes             | Yes           | Yes                      |
| MLNYIEQEV   | ROPN1B   | 9-mer  | Predicted         | 6                                     | 2          | 12        | 12      | No                    | 1,399                       | 0,800     | 5,22E-06 | Yes             | Yes           | No                       |
| AQMWKVVNL   | ROPN1/1B | 9-mer  | Predicted         | 2                                     | 2          | 19        | 38      | No                    | 1,292                       | 0,773     | 1,05E-05 | Yes             | Yes           | No                       |
| LIIRAEELAQM | ROPN1/1B | 11-mer | Eluted            |                                       |            |           |         | No                    | 1,376                       | 0,737     | 4,40E-06 | Yes             | No            | x                        |
| FQFLYTYIA   | ROPN1/1B | 9-mer  | Predicted         | 4                                     | 12         | 93        | 99      | No                    | 1,144                       | 0,660     | 4,13E-06 | Yes             | No            | x                        |
| KMLKEFAKA   | ROPN1/1B | 9-mer  | Predicted         | 9                                     | 4          | 21        | 21      | No                    | 1,244                       | 0,607     | 6,64E-08 | No              | x             | x                        |
| ALACSALGV   | ROPN1/1B | 9-mer  | Predicted         | 6                                     | 9          | 2         | 5       | No                    | 1,157                       | 0,567     | 2,84E-06 | No              | x             | x                        |
| KTLKIVCEV   | ROPN1/1B | 9-mer  | Predicted         | 5                                     | 6          | 7         | 16      | No                    | 1,263                       | 0,526     | 9,50E-05 | Yes             | x             | x                        |
| YIAEVDGEI   | ROPN1B   | 9-mer  | Predicted         | 8                                     | 10         | 6         | 8       | No                    | 1,409                       | 0,807     | x        | x               | x             | x                        |
| LPRIPFSTF   | ROPN1B   | 9-mer  | Eluted            |                                       |            |           |         | No                    | 1,141                       | 0,380     | x        | x               | x             | x                        |
| GVTITKTLK   | ROPN1/1B | 9-mer  | Eluted            |                                       |            |           |         | No                    | 1,184                       | 0,489     | x        | x               | x             | x                        |
| HVSRMLNYI   | ROPN1B   | 9-mer  | Predicted         | 16                                    | 26         | 30        | 7       | No                    | 1,092                       | x         | x        | x               | x             | x                        |
| GLPRIPFSTF  | ROPN1B   | 9-mer  | Eluted            |                                       |            |           |         | No                    | 1,066                       | x         | x        | x               | x             | x                        |
| AELTPELLKI  | ROPN1/1B | 10-mer | Eluted            |                                       |            |           |         | No                    | 1,049                       | x         | x        | x               | x             | x                        |
| MLNYMEQEV   | ROPN1    | 9-mer  | Predicted         | 8                                     | 3          | 12        | 10      | No                    | 0,941                       | x         | x        | x               | x             | x                        |
| SALGVITIK   | ROPN1/1B | 9-mer  | Eluted            |                                       |            |           |         | No                    | 0,921                       | x         | x        | x               | x             | x                        |
| RLIIRAEEL   | ROPN1/1B | 9-mer  | Predicted         | 12                                    | 7          | 3         | 14      | No                    | 0,913                       | x         | x        | x               | x             | x                        |
| ELAQMWKVV   | ROPN1/1B | 9-mer  | Predicted         | 48                                    | 32         | 25        | 9       | No                    | x                           | x         | x        | x               | x             | x                        |
| EICASHVSR   | ROPN1B   | 9-mer  | Eluted            |                                       |            |           |         | No                    | x                           | x         | x        | x               | x             | x                        |
| EVIGPDGIITV | ROPN1    | 11-mer | Eluted            |                                       |            |           |         | No                    | x                           | x         | x        | x               | x             | x                        |
| LPTDLFNSVM  | ROPN1/1B | 10-mer | Eluted            |                                       |            |           |         | No                    | x                           | x         | x        | x               | x             | x                        |
| TVNDFQNP    | ROPN1/1B | 10-mer | Eluted            |                                       |            |           |         | No                    | x                           | x         | x        | x               | x             | x                        |
| VDGEISASH   | ROPN1    | 9-mer  | Eluted            |                                       |            |           |         | No                    | x                           | x         | x        | x               | x             | x                        |
| DLFNSVMNV   | ROPN1/1B | 9-mer  | Predicted         | 7                                     | 5          | 4         | 2       | Yes                   |                             | x         | x        |                 |               |                          |
| ELTPELLKI   | ROPN1/1B | 9-mer  | Predicted         | 18                                    | 8          | 6         | 4       | Yes                   |                             | x         | x        |                 |               |                          |
| LLKILHSQV   | ROPN1/1B | 9-mer  | Predicted         | 13                                    | 18         | 9         | 8       | Yes                   |                             | x         | x        |                 |               |                          |
| LTPPELLKIL  | ROPN1/1B | 9-mer  | Predicted         | 49                                    | 34         | 8         | 34      | Yes                   |                             | x         | x        |                 |               |                          |

|                  |          |       |           |    |    |    |    |     |   |   |
|------------------|----------|-------|-----------|----|----|----|----|-----|---|---|
| <b>TITKTLKIV</b> | ROPN1/1B | 9-mer | Predicted | 35 | 26 | 20 | 3  | Yes | x | x |
| <b>WAADYFEAL</b> | ROPN1    | 9-mer | Predicted | 10 | 23 | 22 | 41 | Yes | x | x |
| <b>EISASHVSR</b> | ROPN1    | 9-mer | Eluted    |    |    |    |    | Yes | x | x |
| <b>FTQNPRVWL</b> | ROPN1B   | 9-mer | Eluted    |    |    |    |    | Yes | x | x |
| <b>LPTDLFNSV</b> | ROPN1/1B | 9-mer | Eluted    |    |    |    |    | Yes | x | x |
| <b>SPRIPFSTF</b> | ROPN1    | 9-mer | Eluted    |    |    |    |    | Yes | x | x |

<sup>a</sup> Peptides were identified with *in silico* scores (provided as ranks) and immunopeptidomics.

<sup>b</sup> Peptides were assessed for potential cross-reactivity using Expitope software. Peptides showing overlap with other human peptides up to 2 amino acid mismatches were excluded.

<sup>c</sup> Recognition of endogenously processed peptide assessed by co-culture of TCR T-cells with TNBC cells expressing ROPN1/1B.
