# Supplementary material for: TCR-Engineered T Cells Directed against Ropporin-1 Constitute a Safe and Effective Treatment for Triple-Negative Breast Cancer
Source: PubMed Central journal article supplement — Cancer Discov. 2024 Aug 21;14(12):2450–70. doi: 10.1158/2159-8290.CD-24-0168 (PMC11609630; doi:10.1158/2159-8290.cd-24-0168), 2024-08-21
Supplement: cd-24-0168_supplementary_table_2_suppst2.pdf [file cd-24-0168_supplementary_table_2_suppst2.pdf]

**Supplementary table 2.** ROPN1/B peptides identified with immunopeptidomics.

| SEQUENCE   | SAMPLE                                                        | PREDICTED HLA SUPERTYPE ALLELES<br>(NETMHCPAN 4.1 OR NETMHCCON 1.1) | POTENTIAL HLA MATCH<br>(ACCORDING TO HLA TYPING)                                                     | PROTEIN      | HLA TYPE | PRIDE                |
|------------|---------------------------------------------------------------|---------------------------------------------------------------------|------------------------------------------------------------------------------------------------------|--------------|----------|----------------------|
| GEISASHV   | T1015A_I, Mel-20_I                                            | HLA-B40:01                                                          | T1015 (HLA-B40:01)                                                                                   | Q9HAT0 ROP1A | TYPE_I   | PXD004894, PXD013649 |
| SPRIPFSTF  | OD5P_I, Mel-16_I, Mel-29_I,<br>Mel-8_I                        | HLA-A26:01; HLA-B07:02; HLA-B08:01;<br>HLA-B15:01                   | OD5P (HLA-B07:02; HLA-B15:01),<br>Mel-16 (HLA-B07:02; HLA-B08:01),<br>Mel-8 (HLA-B07:02; HLA-B08:01) | Q9HAT0 ROP1A | TYPE_I   | PXD004894, PXD013649 |
| FTQNPRVQL  | T1185B_I                                                      | HLA-A26:01; HLA-B07:02; HLA-B08:01                                  | T1185B (HLA-C03:04)                                                                                  | Q9HAT0 ROP1A | TYPE_I   | PXD013649            |
| FLYTYIAKV  | Mel-25_I, T1185B_I                                            | HLA-A02:01; HLA-B08:01                                              | T1185B (HLA-A02:01)                                                                                  | Q9HAT0 ROP1A | TYPE_I   | PXD004894, PXD013649 |
| EISASHVSR  | Mel-15_I, T1185B_I                                            | HLA-A26:01                                                          | T1185B (HLA-A68:01)                                                                                  | Q9HAT0 ROP1A | TYPE_I   | PXD004894, PXD013649 |
| GVTITKTLK  | Mel-15_I, Mel-39_I, Mel-36_I,<br>Mel-8_I                      | HLA-A03:01                                                          | Mel-15 (HLA-A03:01), Mel-8 (HLA-A03:01)                                                              | Q9BZX4 ROP1B | TYPE_I   | PXD004894            |
| SALGVTITK  | Mel-39_I, Mel-20_I, Mel-36_I,<br>Mel-21_I, T1185B_I, Mel-41_I | HLA-A03:01                                                          | T1185B (HLA-A68:01)                                                                                  | Q9BZX4 ROP1B | TYPE_I   | PXD004894, PXD013649 |
| TVNDFTQNPR | T1185B_I                                                      | none                                                                | T1185B (HLA-A68:01)                                                                                  | Q9BZX4 ROP1B | TYPE_I   | PXD013649            |
| LPTDLFNSV  | Mel-15_I, T1015A_I, Mel-39_I,<br>Mel-35_I, Mel-25_I, Mel-4_I  | HLA-B07:02; HLA-B08:01; HLA-B39:01                                  | Mel-15 (HLA-B35:03), T1015A (HLA-B35:03)                                                             | Q9BZX4 ROP1B | TYPE_I   | PXD004894, PXD013649 |
| GLPRIPFSTF | Mel-27_I                                                      | HLA-A24:02; HLA-B07:02; HLA-B15:01                                  | ---                                                                                                  | Q9BZX4 ROP1B | TYPE_I   | PXD004894            |
| EICASHVSR  | T1185B_I                                                      | none                                                                | T1185B (HLA-A68:01)                                                                                  | Q9BZX4 ROP1B | TYPE_I   | PXD013649            |

|                    |                                           |                                                               |                                                                    |              |        |                          |
|--------------------|-------------------------------------------|---------------------------------------------------------------|--------------------------------------------------------------------|--------------|--------|--------------------------|
| <b>LPRIPFSTF</b>   | Mel-16_I, Mel-39_I, Mel-29_I,<br>Mel-8_I  | HLA-A26:01; HLA-B07:02; HLA-B08:01                            | Mel-16 (HLA-B07:02; HLA-B08:01),<br>Mel-8 (HLA-B07:02; HLA-B08:01) | Q9BZX4 ROP1B | TYPE_I | PXD004894                |
| <b>LPTDLFNSVM</b>  | Mel-39_I                                  | HLA-B07:02                                                    | ---                                                                | Q9BZX4 ROP1B | TYPE_I | PXD004894, PXD013649     |
| <b>EVIGPDGLITV</b> | Mel-38_I, ONVC_I                          | HLA-A02:01; HLA-A26:01                                        | ONVC (HLA-A26:01)                                                  | Q9BZX4 ROP1B | TYPE_I | PXD004894, PXD013649     |
| <b>FTQNPRVWL</b>   | HLA-A2 <sup>+</sup> K562ABC+ROPN1B        | none                                                          | ---                                                                | Q9BZX4 ROP1B | TYPE_I | Current study            |
| <b>AELTPELLKI</b>  | HLA-A2 <sup>+</sup> MDA-MB-<br>231+ROPN1B | HLA-A02:01; HLA-B40:01; HLA-B40:02;<br>HLA-B41:01; HLA-B41:02 | NA                                                                 | Q9BZX4 ROP1B | TYPE_I | Current study, PXD054804 |
| <b>LIIRAEELAQM</b> | HLA-A2 <sup>+</sup> MDA-MB-<br>231+ROPN1B | HLA-A26:01                                                    | NA                                                                 | Q9BZX4 ROP1B | TYPE_I | Current study, PXD054804 |
