# Supplementary material for: TCR-Engineered T Cells Directed against Ropporin-1 Constitute a Safe and Effective Treatment for Triple-Negative Breast Cancer
Source: PubMed Central journal article supplement — Cancer Discov. 2024 Aug 21;14(12):2450–70. doi: 10.1158/2159-8290.CD-24-0168 (PMC11609630; doi:10.1158/2159-8290.cd-24-0168), 2024-08-21
Supplement: cd-24-0168_supplementary_table_3_suppst3.pdf [file cd-24-0168_supplementary_table_3_suppst3.pdf]

**Supplementary table 3.** Overview of healthy cell lines.

| <b>NAME</b>      | <b>CELL TYPE</b>                         | <b>PROVIDER</b> |
|------------------|------------------------------------------|-----------------|
| <b>HBEPC</b>     | Human Bronchial Epithelial Cells         | PromoCell       |
| <b>HCAEC</b>     | Human Coronary Artery Endothelial Cells  | PromoCell       |
| <b>HCF</b>       | Human Cardiac Fibroblasts                | ScienceCell     |
| <b>HOB</b>       | Human Osteoblasts                        | ScienceCell     |
| <b>HPF</b>       | Human Pulmonary Fibroblasts              | ScienceCell     |
| <b>HWP</b>       | Human White Preadipocytes (subcutaneous) | ScienceCell     |
| <b>NHDF</b>      | Normal Human Dermal Fibroblasts          | PromoCell       |
| <b>NHEK</b>      | Normal Human Epidermal Keratinocytes     | PromoCell       |
| <b>T-CELLS</b>   | CD3 <sup>+</sup> T-cells                 | Sanquin         |
| <b>MONOCYTES</b> | CD14 <sup>+</sup> Monocytes              | Sanquin         |
| <b>B-CELLS</b>   | CD19 <sup>+</sup> B-cells                | Sanquin         |
